# Supplementary material for: Superexchange interactions between Fe-3d and Ln-4f states: long range antiferromagnetism in perovskite derivatives Ba3LnFe2O7.5
Source: Royal Society of Chemistry journal article supplement (doi:10.1039/c7tc01710c), 2017-01-01
Supplement: c7tc01710c1.pdf [file c7tc01710c1.pdf]

Table S1: Structural parameters obtained from Rietveld refinement of XRPD data for  $\text{Ba}_3\text{LnFe}_2\text{O}_{7.5}$  (Ln = Sm, Eu, Gd, Dy, Ho, Y and Er). All the crystallographic sites are fully occupied ( $\text{sof} = 1$ ).

$\text{Ba}_3\text{SmFe}_2\text{O}_{7.5}$  :  $\chi^2 = 3.48$ ,  $R_{\text{Bragg}} = 9.39\%$

| Atom | x          | y          | z          |
|------|------------|------------|------------|
| Ba1  | 0          | 0.2929(29) | 1/4        |
| Ba2  | 1/2        | 0.3345(26) | 1/4        |
| Ba3  | 0.0246(13) | 0.7532(31) | 0.0905(06) |
| Ba4  | 0.4968(15) | 0.2449(32) | 0.5798(07) |
| Sm   | 0.2451(17) | 0.2542(30) | 0.4112(07) |
| Fe1  | 0.2455(40) | 0.2538(63) | 0.0599(17) |
| Fe2  | 0.2376(40) | 0.7756(45) | 0.2654(17) |
| O1   | 0          | 0.7185(56) | 1/4        |
| O2   | 0.0280(18) | 0.7419(42) | 0.6247(8)  |
| O3   | 0.4731(22) | 0.1986(34) | 0.0907(11) |
| O4   | 0.2583(30) | 0.0634(31) | 0.3004(10) |
| O5   | 0.2694(30) | 0.5612(32) | 0.3471(13) |
| O6   | 0.2370(34) | 0.4764(37) | 0.5054(15) |
| O7   | 0.2415(33) | 0.0515(33) | 0.9887(13) |
| O8   | 0.2966(24) | 0.3669(27) | 0.6639(11) |

$\text{Ba}_3\text{EuFe}_2\text{O}_{7.5}$  :  $\chi^2 = 3.21$ ,  $R_{\text{Bragg}} = 10.1\%$

| Atom | x          | y          | z          |
|------|------------|------------|------------|
| Ba1  | 0          | 0.2881(27) | 1/4        |
| Ba2  | 1/2        | 0.3233(24) | 1/4        |
| Ba3  | 0.0227(11) | 0.7535(31) | 0.0901(5)  |
| Ba4  | 0.4969(14) | 0.2462(32) | 0.5802(6)  |
| Eu   | 0.2430(16) | 0.2527(27) | 0.4101(7)  |
| Fe1  | 0.2463(33) | 0.2506(59) | 0.0572(13) |
| Fe2  | 0.2382(34) | 0.7738(38) | 0.2630(15) |
| O1   | 0          | 0.8360(37) | 1/4        |
| O2   | 0.0298(14) | 0.7696(37) | 0.6221(6)  |
| O3   | 0.4803(19) | 0.2098(34) | 0.0944(8)  |
| O4   | 0.2571(26) | 0.0583(27) | 0.3113(8)  |
| O5   | 0.2565(27) | 0.5636(28) | 0.3388(11) |
| O6   | 0.2374(44) | 0.5042(79) | 0.5025(20) |
| O7   | 0.2360(44) | 0.0007(81) | 1.0013(18) |
| O8   | 0.2948(22) | 0.4274(29) | 0.6682(11) |

$\text{Ba}_3\text{GdFe}_2\text{O}_{7.5}$  :  $\chi^2 = 4.46$ ,  $R_{\text{Bragg}} = 8.97\%$

| Atom | x | y | z |
|------|---|---|---|
|------|---|---|---|

|     |            |            |            |
|-----|------------|------------|------------|
| Ba1 | 0          | 0.2815(55) | 1/4        |
| Ba2 | 1/2        | 0.3300(46) | 1/4        |
| Ba3 | 0.0240(22) | 0.7532(51) | 0.0884(10) |
| Ba4 | 0.4969(25) | 0.2448(53) | 0.5801(12) |
| Gd  | 0.2437(28) | 0.2386(40) | 0.4100(13) |
| Fe1 | 0.2458(63) | 0.2836(86) | 0.0616(28) |
| Fe2 | 0.2271(56) | 0.7769(79) | 0.2655(29) |
| O1  | 0          | 0.7887(84) | 1/4        |
| O2  | 0.0420(33) | 0.7580(70) | 0.6132(13) |
| O3  | 0.4704(39) | 0.1947(51) | 0.0825(18) |
| O4  | 0.2716(43) | 0.0595(49) | 0.2985(15) |
| O5  | 0.2817(44) | 0.5313(58) | 0.3370(22) |
| O6  | 0.2399(57) | 0.4996(75) | 0.4973(29) |
| O7  | 0.2401(61) | 0.0114(67) | 0.9954(28) |
| O8  | 0.3426(36) | 0.4167(43) | 0.6682(20) |

Ba<sub>3</sub>DyFe<sub>2</sub>O<sub>7.5</sub> :  $\chi^2= 1.95$ , R<sub>Bragg</sub> = 11.9 %

| Atom | x           | y          | z          |
|------|-------------|------------|------------|
| Ba1  | 0           | 0.2812(42) | 1/4        |
| Ba2  | 1/2         | 0.3236(36) | 1/4        |
| Ba3  | 0.02059(17) | 0.7563(46) | 0.0892(7)  |
| Ba4  | 0.4967(22)  | 0.2502(46) | 0.5797(10) |
| Dy   | 0.2452(27)  | 0.2533(41) | 0.4107(10) |
| Fe1  | 0.2456(51)  | 0.2612(91) | 0.0618(22) |
| Fe2  | 0.2394(60)  | 0.7641(60) | 0.2687(24) |
| O1   | 0           | 0.7775(71) | 1/4        |
| O2   | 0.0214(25)  | 0.7697(57) | 0.6135(8)  |
| O3   | 0.4803(35)  | 0.1978(41) | 0.0787(15) |
| O4   | 0.2614(41)  | 0.0493(37) | 0.3025(12) |
| O5   | 0.2741(43)  | 0.5465(41) | 0.3489(16) |
| O6   | 0.2379(49)  | 0.5039(74) | 0.4972(23) |
| O7   | 0.2194(46)  | 0.0144(66) | 0.9925(20) |
| O8   | 0.2981(30)  | 0.3905(32) | 0.6599(14) |

Ba<sub>3</sub>HoFe<sub>2</sub>O<sub>7.5</sub> :  $\chi^2= 2.09$ , R<sub>Bragg</sub> = 8.63 %

| Atom | x          | y          | z          |
|------|------------|------------|------------|
| Ba1  | 0          | 0.2760(36) | 1/4        |
| Ba2  | 1/2        | 0.3210(27) | 1/4        |
| Ba3  | 0.0190(14) | 0.7530(34) | 0.0891(6)  |
| Ba4  | 0.4976(18) | 0.2440(35) | 0.5794(8)  |
| Ho   | 0.2440(22) | 0.2485(35) | 0.4111(8)  |
| Fe1  | 0.2476(41) | 0.2549(73) | 0.0570(17) |

|     |              |            |              |
|-----|--------------|------------|--------------|
| Fe2 | 0.2415(4356) | 0.7754(48) | 0.266380(18) |
| O1  | 0            | 0.8009(51) | 1/4          |
| O2  | 0.0317 (19)  | 0.7612(48) | 0.6154(7)    |
| O3  | 0.4696(23)   | 0.2031(35) | 0.0864(11)   |
| O4  | 0.2637(29)   | 0.0385(31) | 0.2998(9)    |
| O5  | 0.2654(35)   | 0.5514(33) | 0.3394(15)   |
| O6  | 0.2419(36)   | 0.5189(55) | 0.5006(18)   |
| O7  | 0.2151(31)   | 0.0138(52) | 0.9956(15)   |
| O8  | 0.2949(23)   | 0.3698(26) | 0.6640(11)   |

Ba<sub>3</sub>YFe<sub>2</sub>O<sub>7.5</sub> :  $\chi^2= 2.16$ , R<sub>Bragg</sub> = 7.64 %

| Atom | x           | y          | z          |
|------|-------------|------------|------------|
| Ba1  | 0           | 0.2769(31) | 1/4        |
| Ba2  | 1/2         | 0.3179(24) | ¼          |
| Ba3  | 0.0207(13)  | 0.7517(28) | 0.0894(6)  |
| Ba4  | 0.4982(17)  | 0.2465(29) | 0.5784(7)  |
| Y    | 0.2445(29)  | 0.2521(46) | 0.4117(12) |
| Fe1  | 0.2471(38)  | 0.2544(65) | 0.0603(16) |
| Fe2  | 0.2413(40)  | 0.7678(44) | 0.2669(18) |
| O1   | 0           | 0.7395(59) | ¼          |
| O2   | 0.0157(18)  | 0.7515(41) | 0.6116(6)  |
| O3   | 0.4888(28)  | 0.2307(38) | 0.0794(11) |
| O4   | 0.2492(32)  | 0.0447(34) | 0.3141(12) |
| O5   | 0.2616(32)  | 0.5632(31) | 0.3479(14) |
| O6   | 0.2361(33)  | 0.5044(52) | 0.5011(18) |
| O7   | 0.20201(23) | 0.0080(43) | 0.9962(14) |
| O8   | 0.2865(21)  | 0.3631(23) | 0.6615(9)  |

Ba<sub>3</sub>ErFe<sub>2</sub>O<sub>7.5</sub> :  $\chi^2= 2.20$ , R<sub>Bragg</sub> = 6.79 %

| Atom | x          | y          | z          |
|------|------------|------------|------------|
| Ba1  | 0          | 0.2829(22) | 1/4        |
| Ba2  | 1/2        | 0.3184(20) | 1/4        |
| Ba3  | 0.0257(9)  | 0.7465(22) | 0.0879(4)  |
| Ba4  | 0.4982(11) | 0.2421(22) | 0.5772(5)  |
| Er   | 0.2448(12) | 0.2526(22) | 0.4081(5)  |
| Fe1  | 0.2506(28) | 0.2515(52) | 0.0595(12) |
| Fe2  | 0.2341(28) | 0.7741(37) | 0.2667(12) |
| O1   | 0          | 0.7296(46) | ¼          |
| O2   | 0.0342(15) | 0.7895(27) | 0.6110(6)  |
| O3   | 0.4799(18) | 0.3144(23) | 0.0917(8)  |
| O4   | 0.2577(24) | 0.0562(24) | 0.3097(9)  |
| O5   | 0.2628(24) | 0.5668(24) | 0.3514(10) |

|    |            |             |            |
|----|------------|-------------|------------|
| O6 | 0.2238(28) | 0.5235(33)  | 0.4966(11) |
| O7 | 0.2229(26) | -0.0135(31) | 1.0104(12) |
| O8 | 0.2870(19) | 0.3880(21)  | 0.6699(8)  |
